# Supplementary material
Source: Research Square preprint supplement (doi:10.21203/rs.3.rs-9053890/v1)

### A Fig 1 Day 1 Conditioning

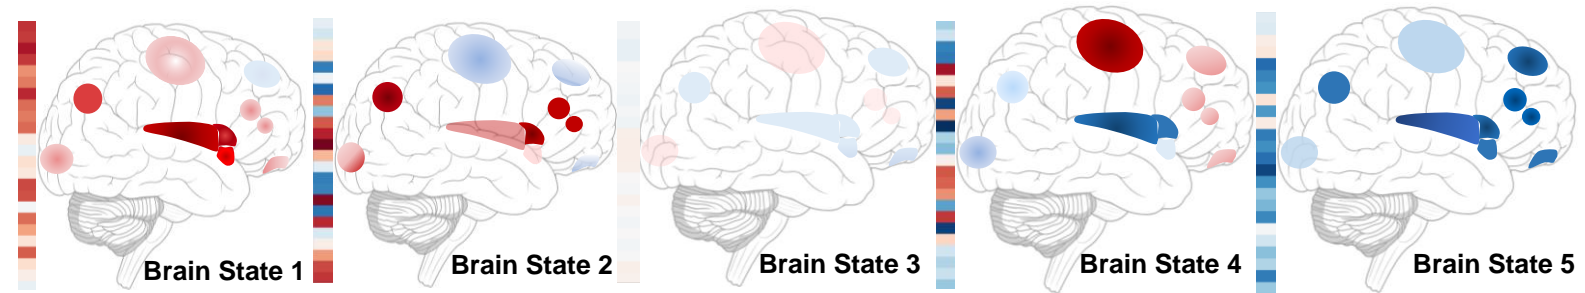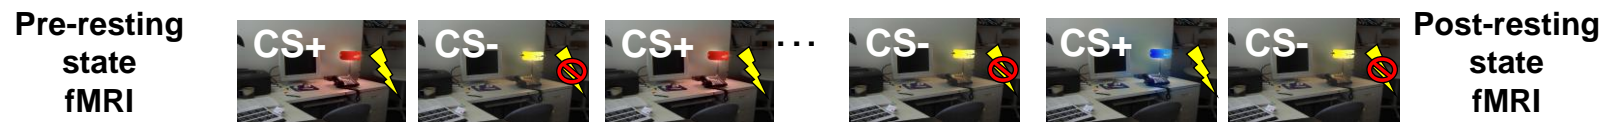

Fear Learning Induced Co-activation Analysis (CAPs)

Fear Learning Induced Brain State Transition

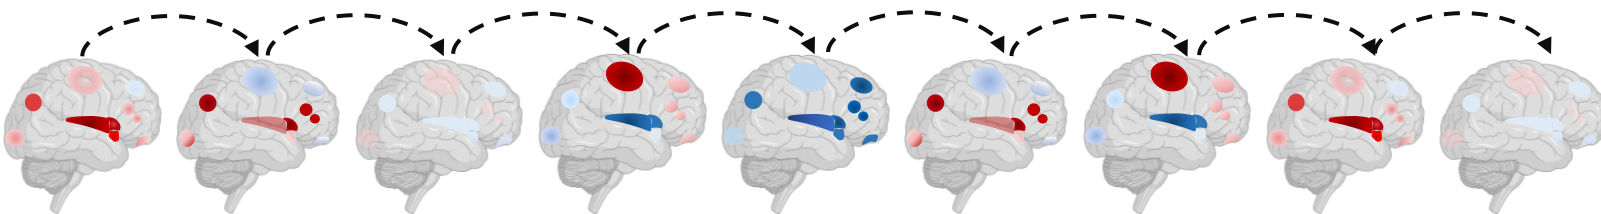

Fear Learning Induced 'Edited' Connectivity

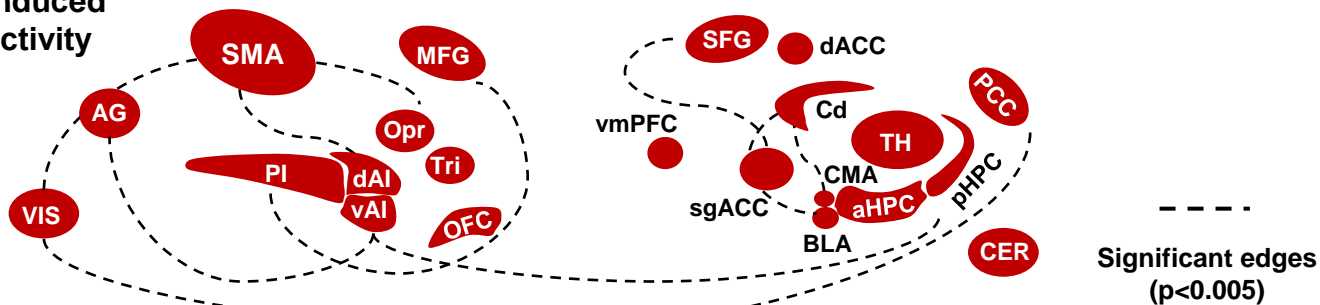

### B Day 2 Extinction

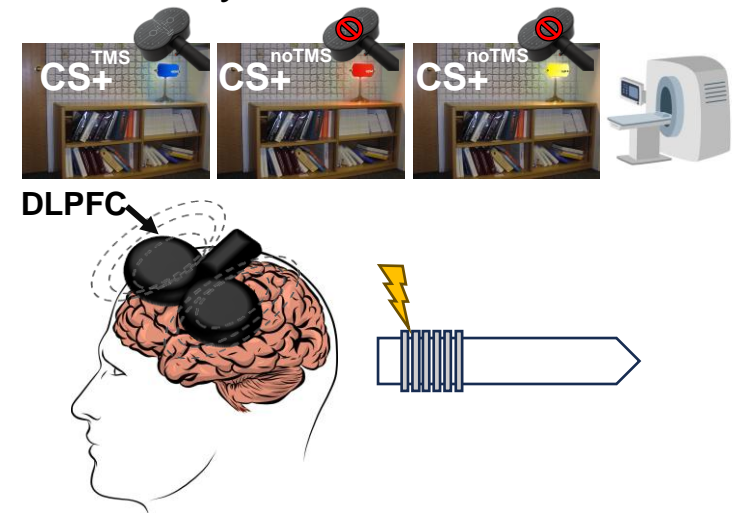

### C Day 3 Memory Consolidation

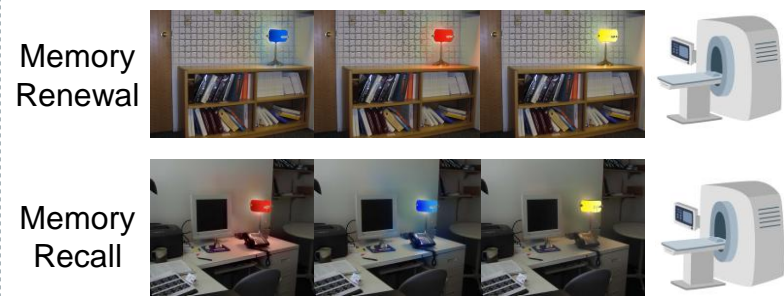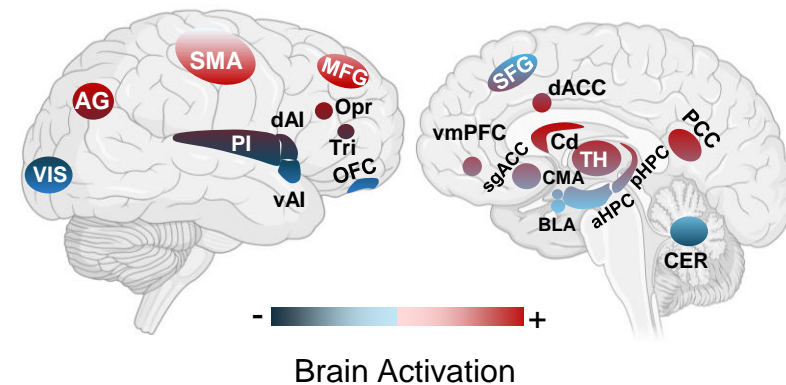

**Fig 2**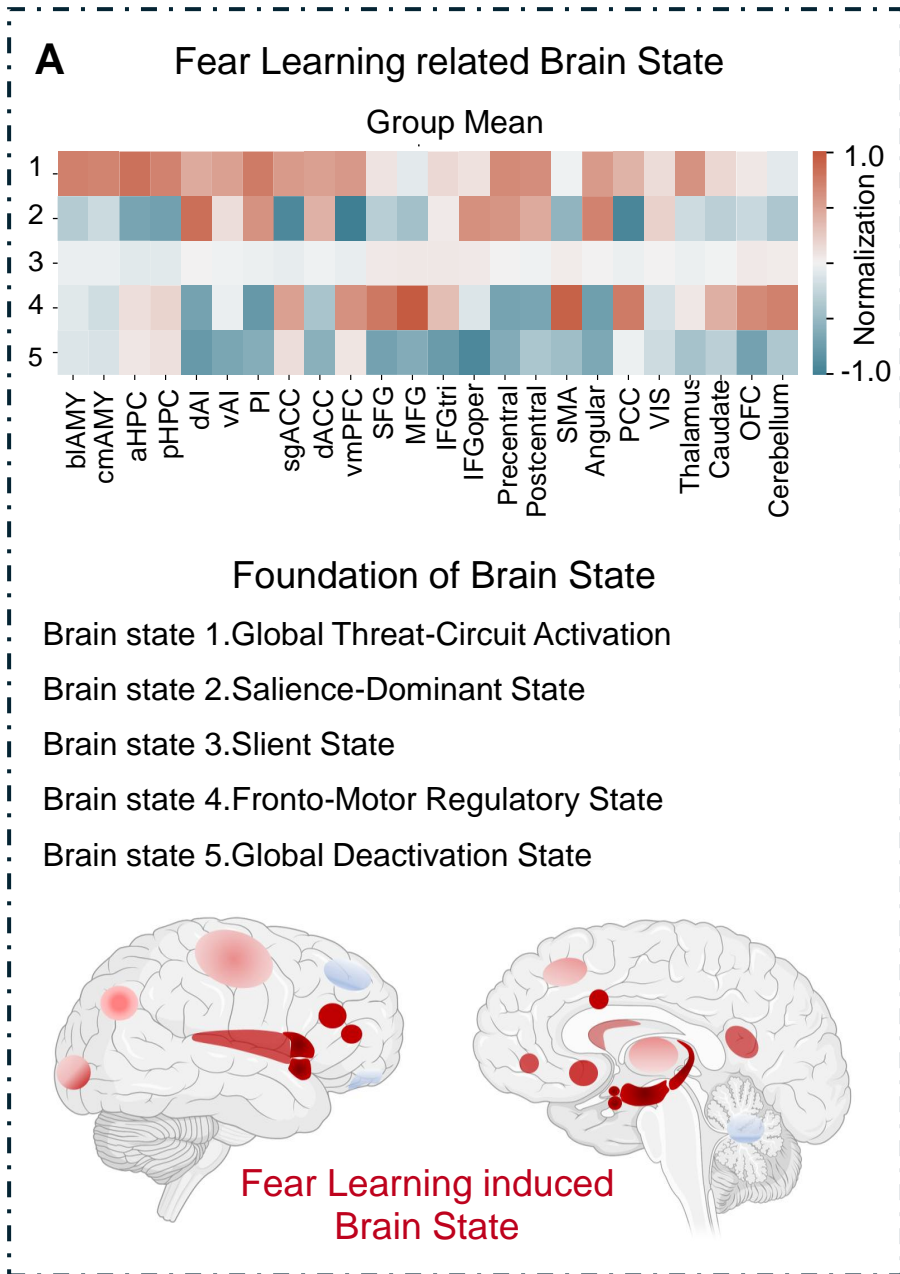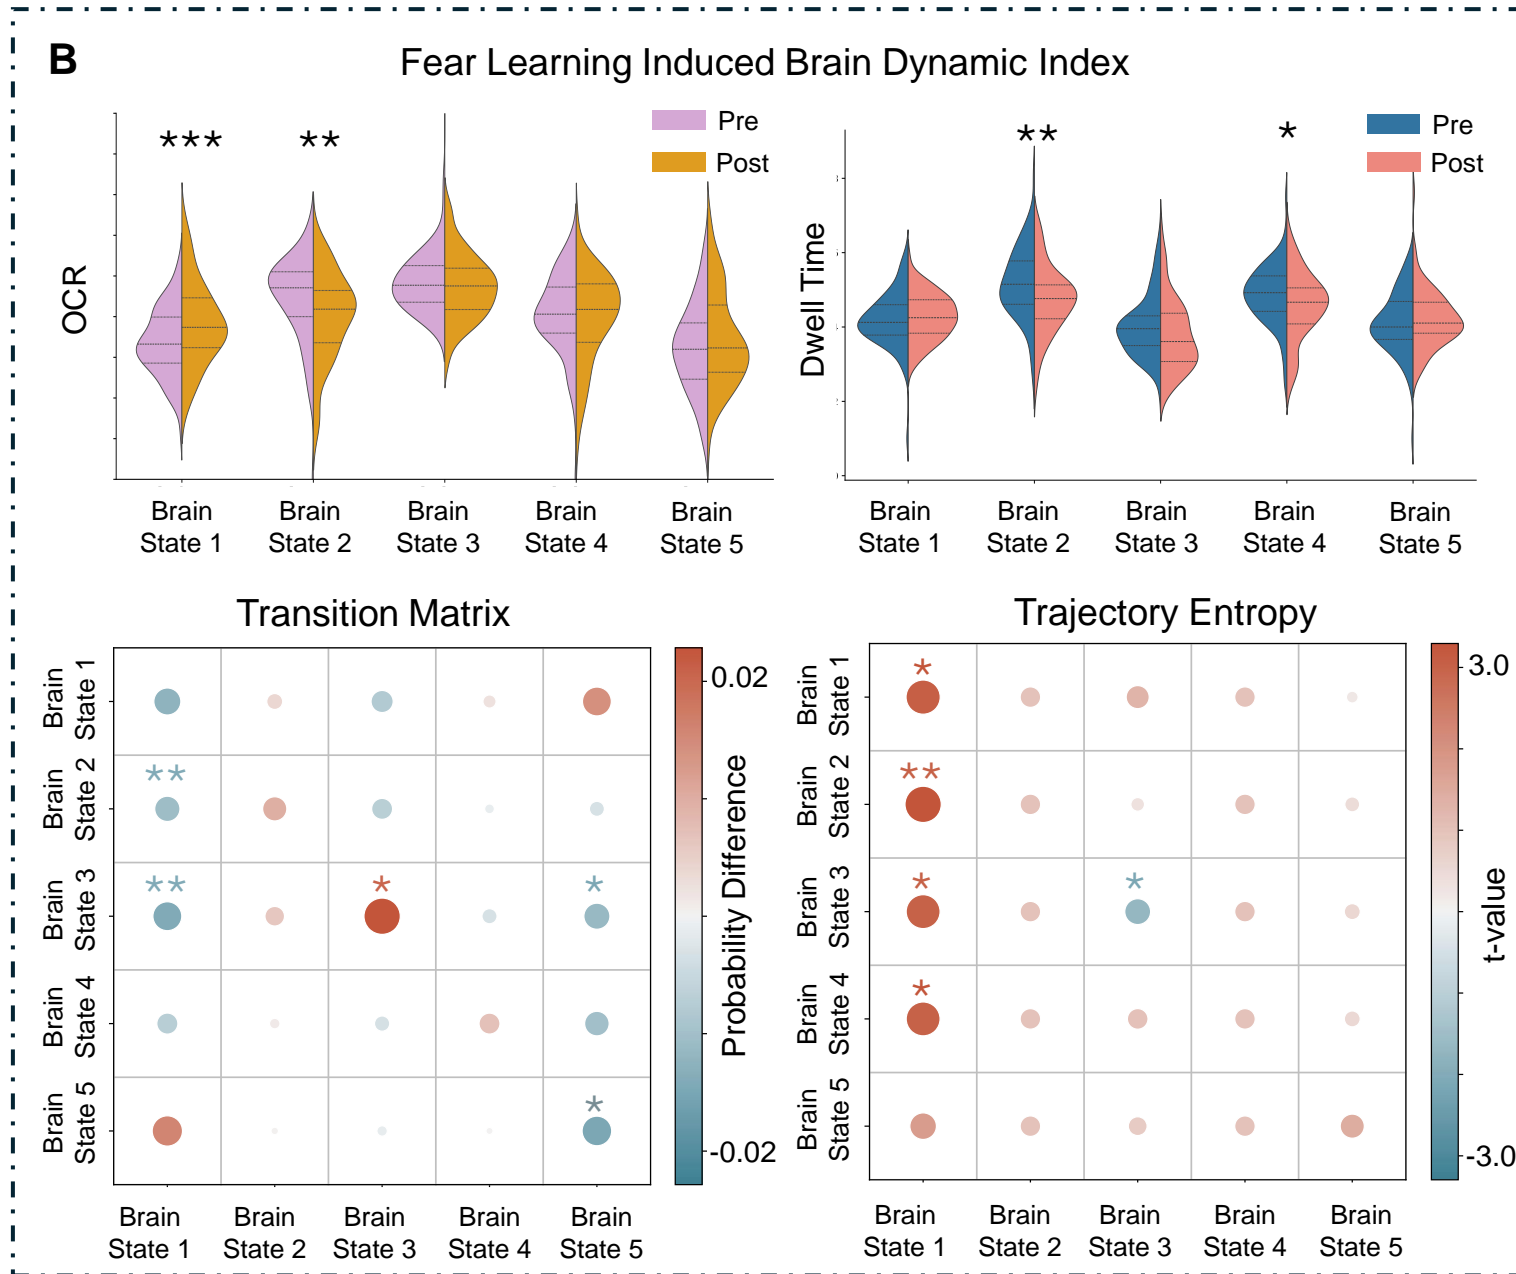

**Fig 3**

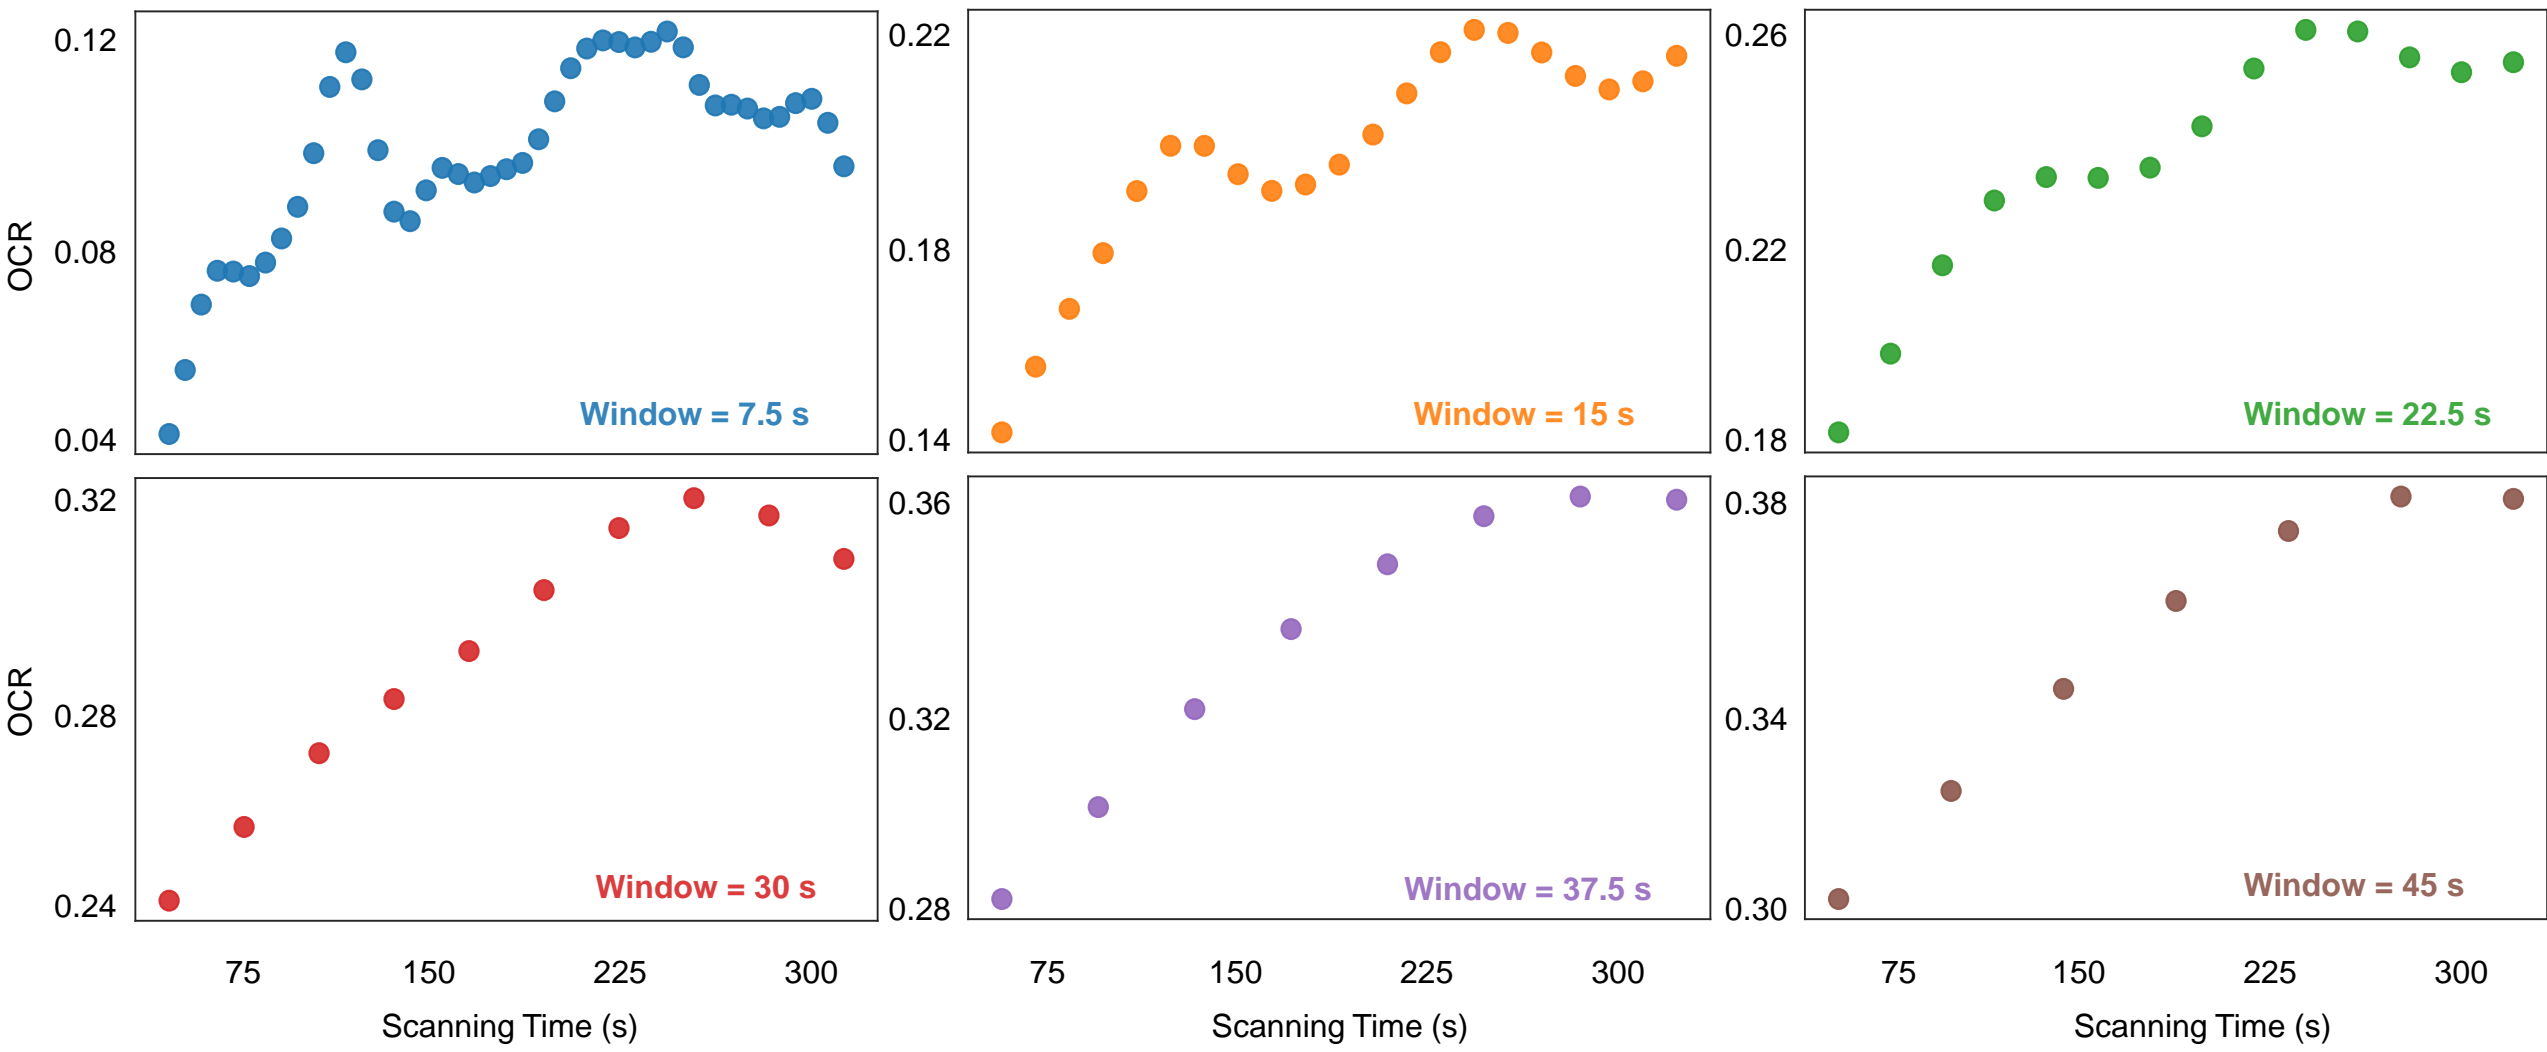

**Fig 4**

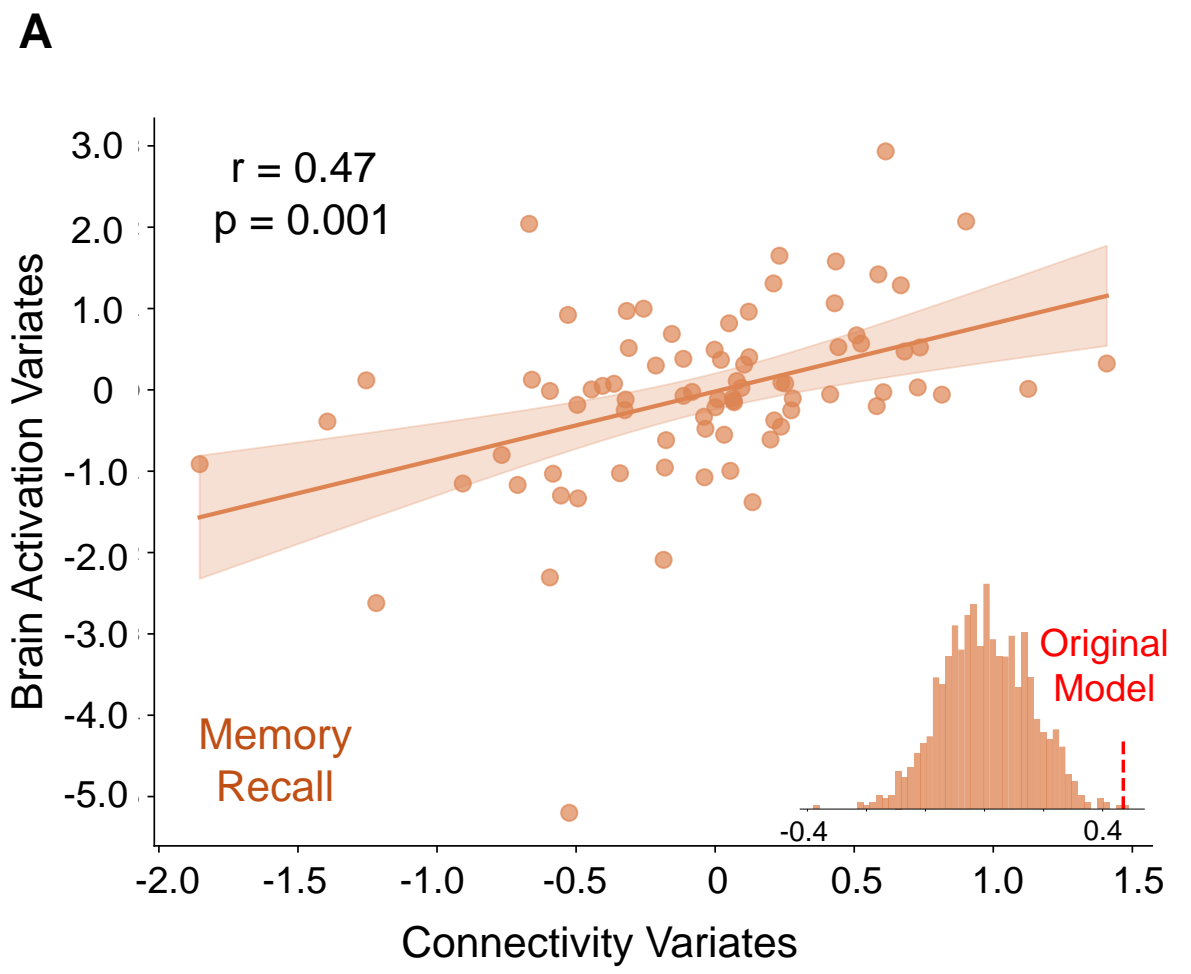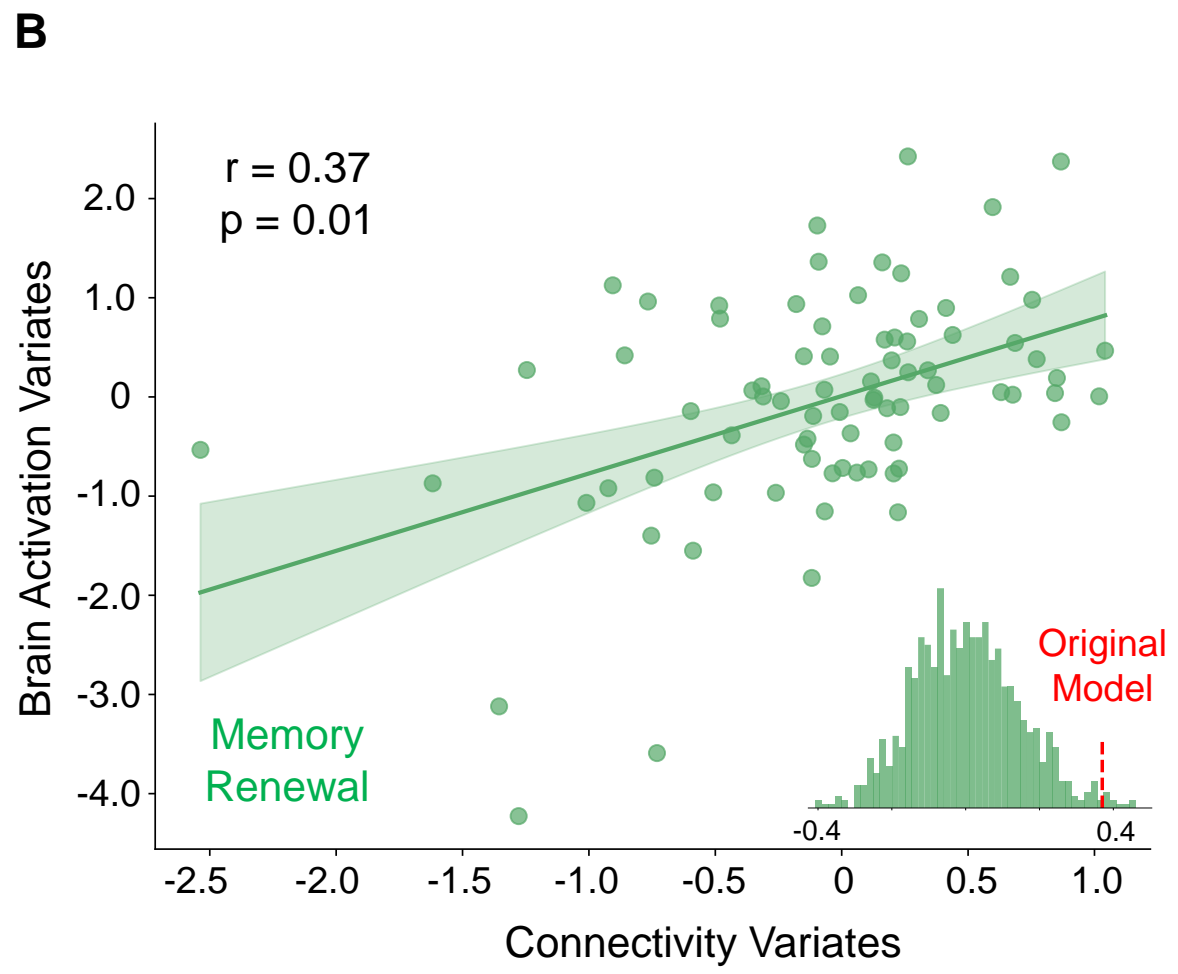



**Fig 6**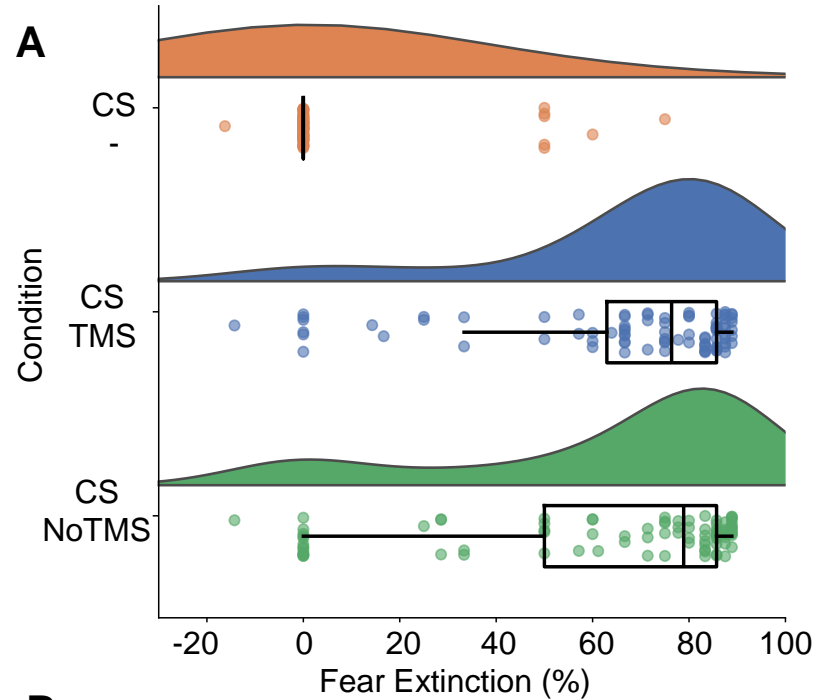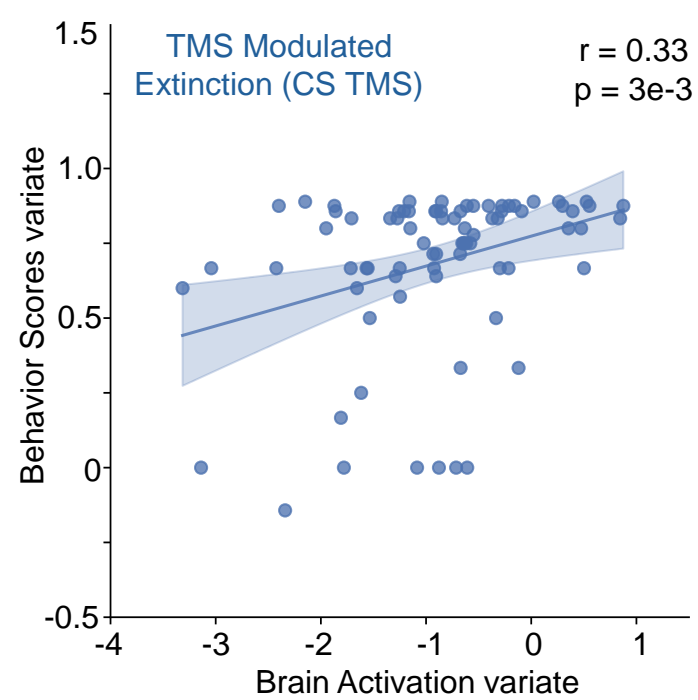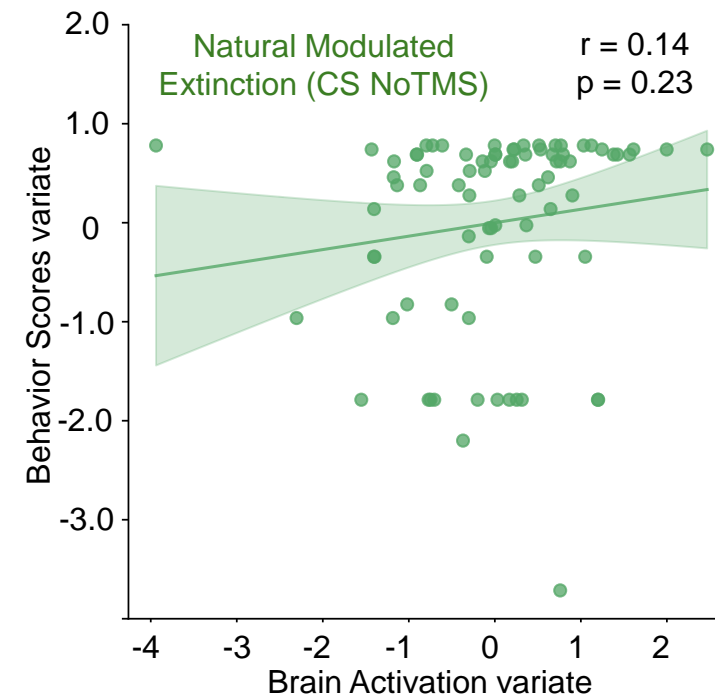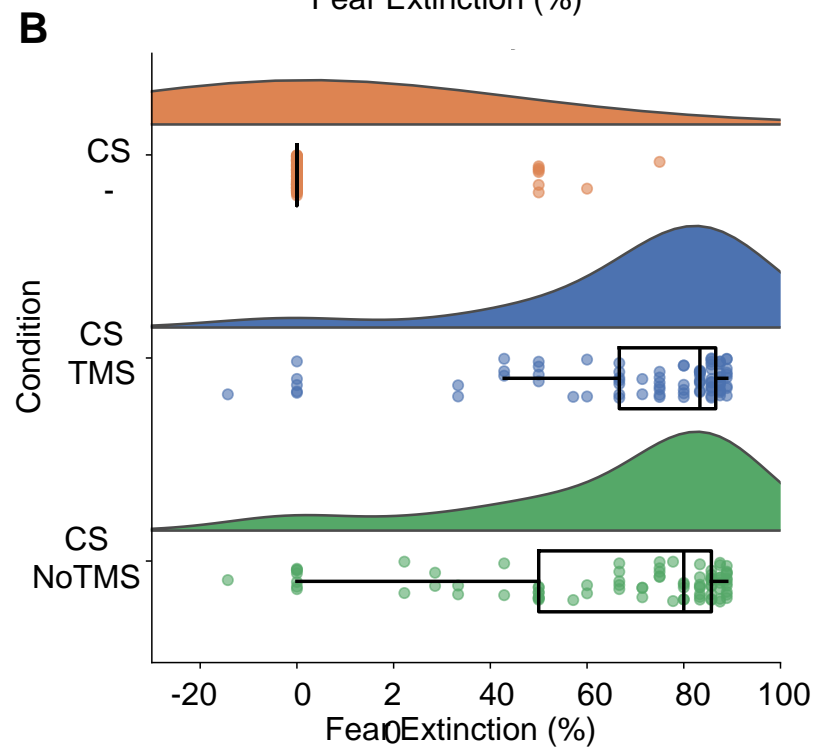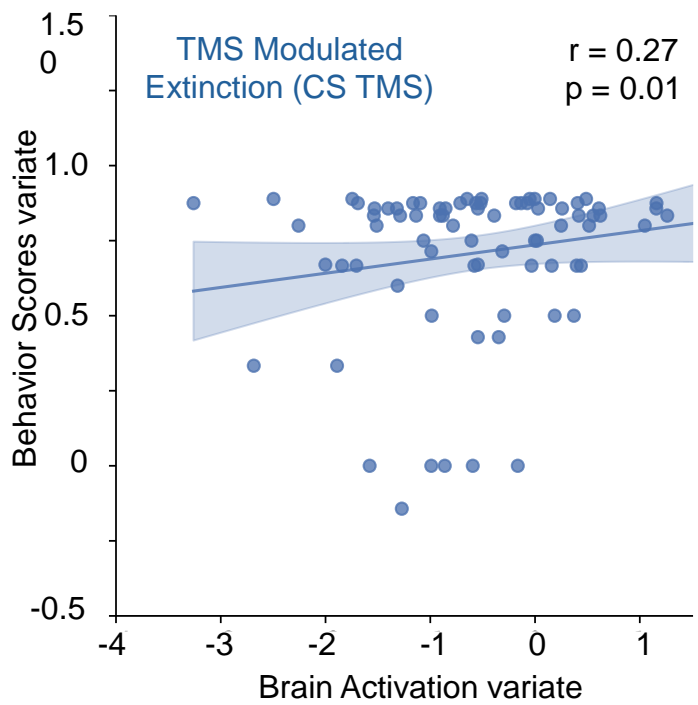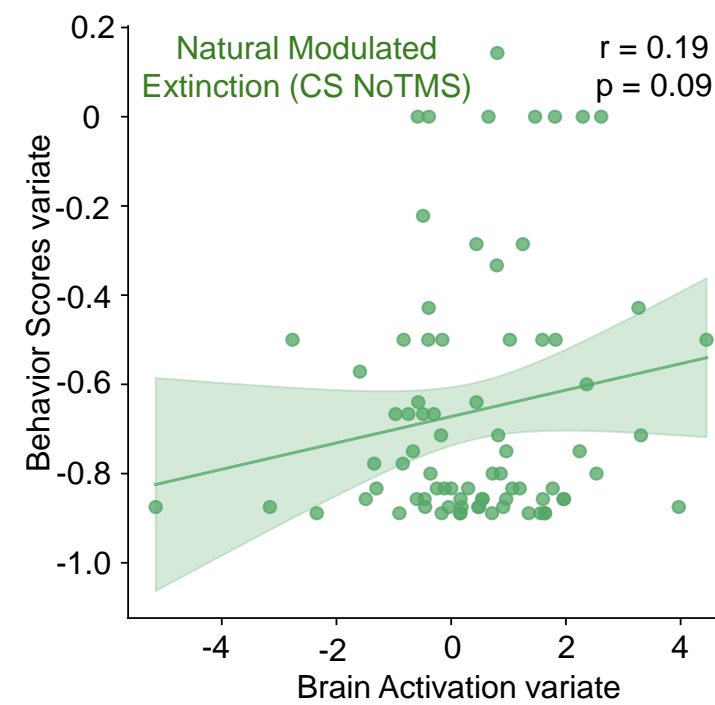

**Fig S1**

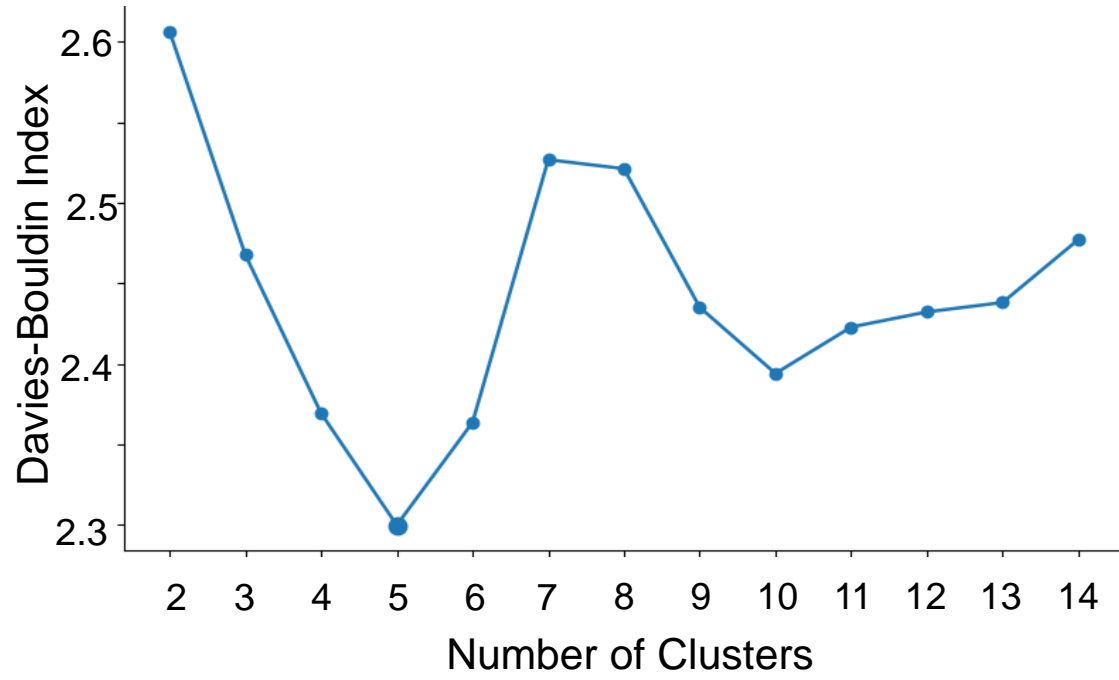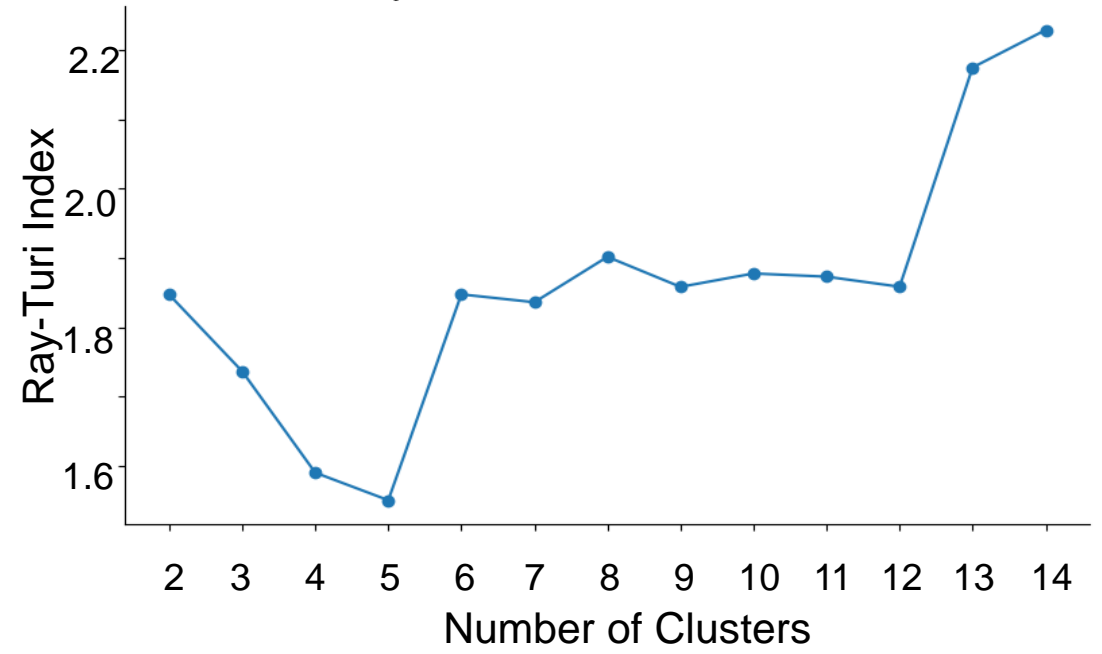

**Fig S2**

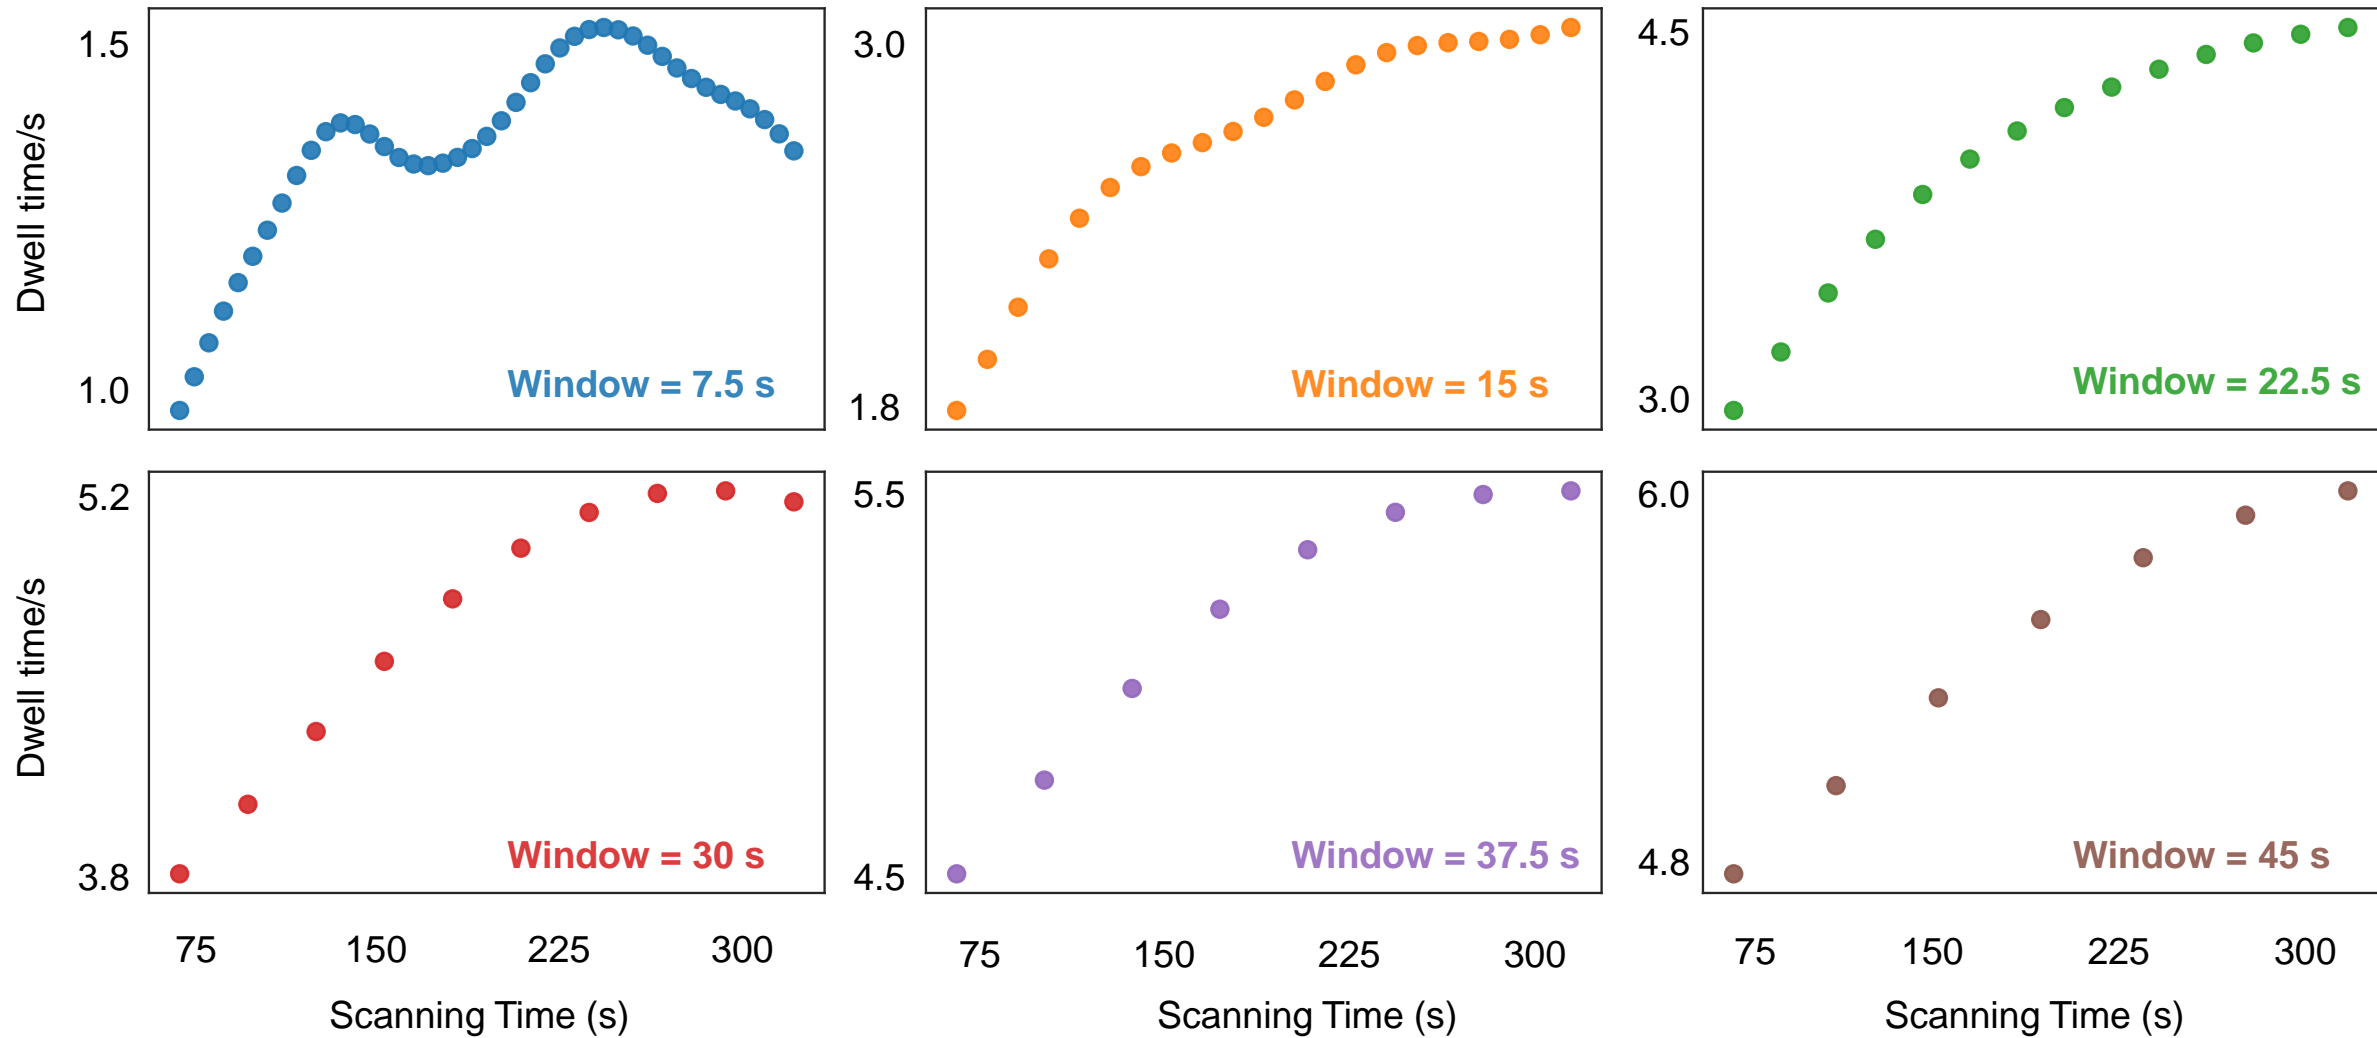

**Fig S3**

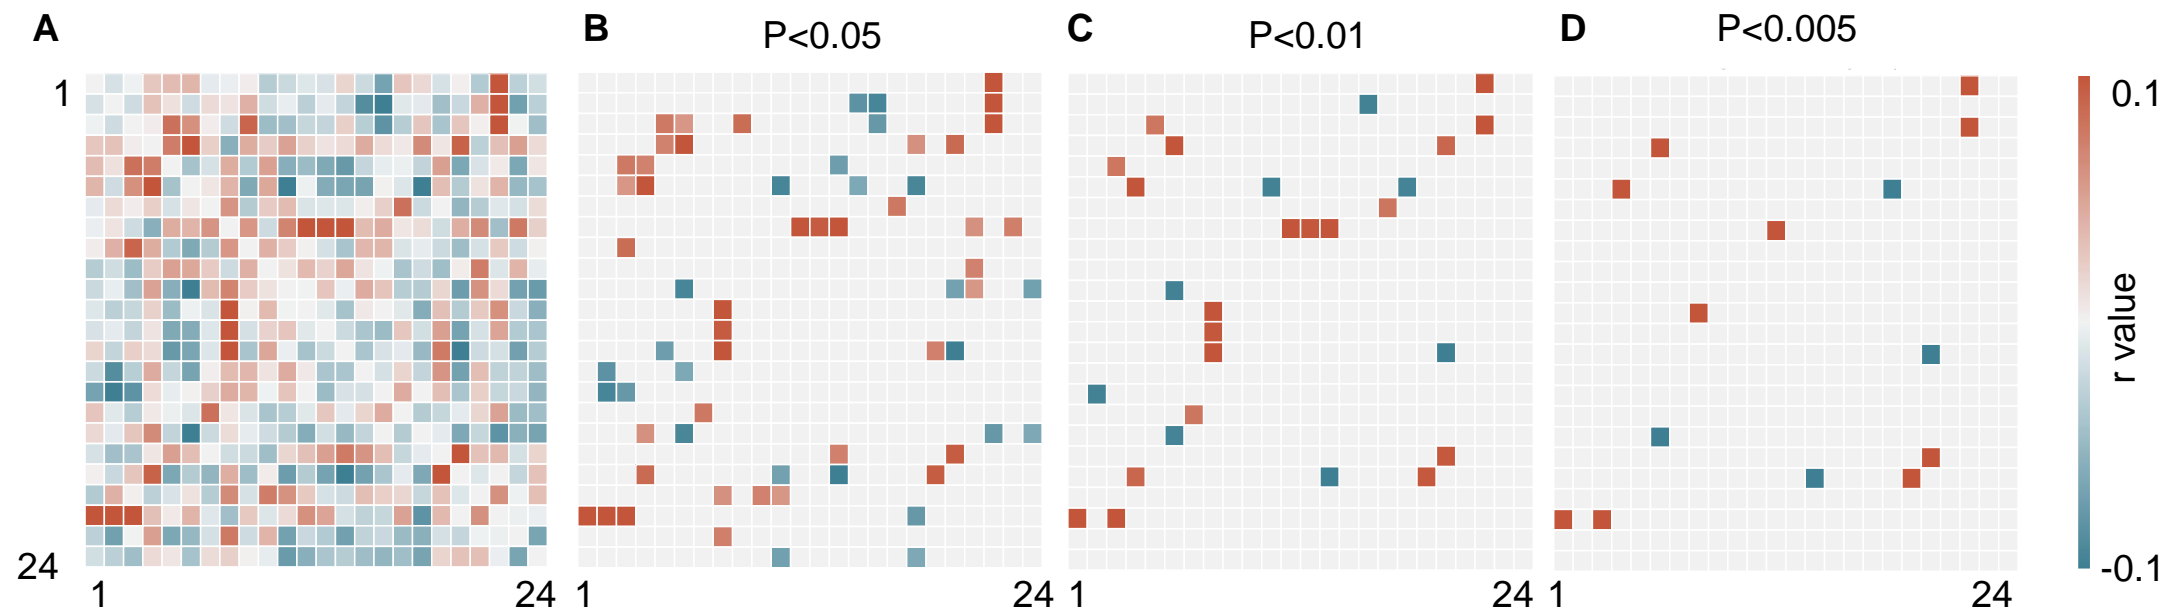

**Fig S4**

**Top 5 ROIs**

**Ranked by Activation**

- VIS
- dAI
- vAI
- IFGoper
- dACC

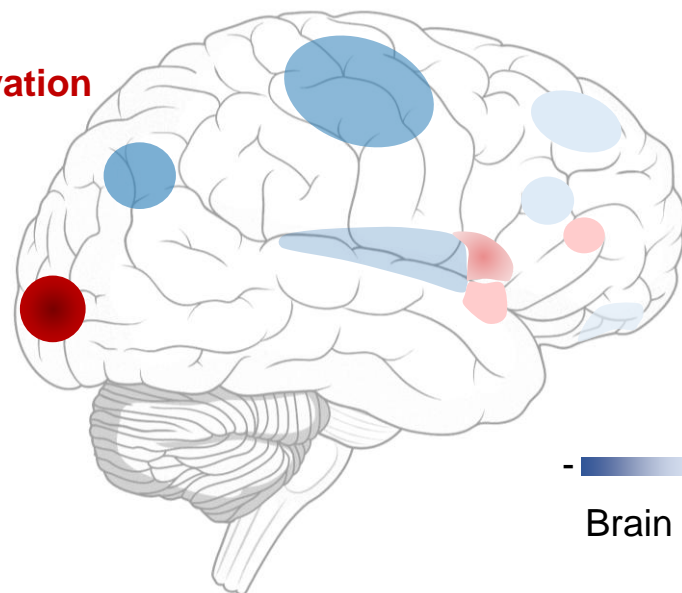

**Renewal**

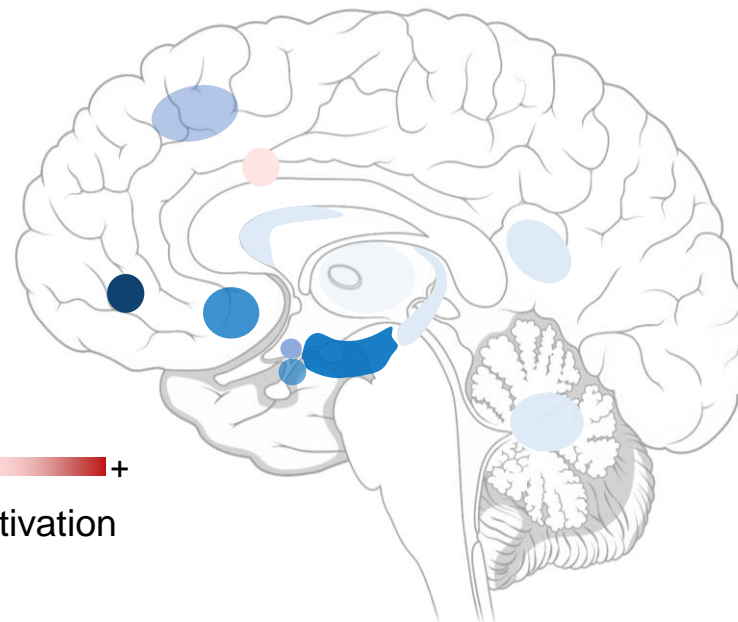

**Top 5 ROIs**

**Ranked by Deactivation**

- vmPFC
- Postcentral
- aHPC
- biAMY
- Precentral

-  +  
Brain Activation

**Top 5 ROIs**

**Ranked by Activation**

- VIS
- dAI
- vAI
- dACC
- IFGoper

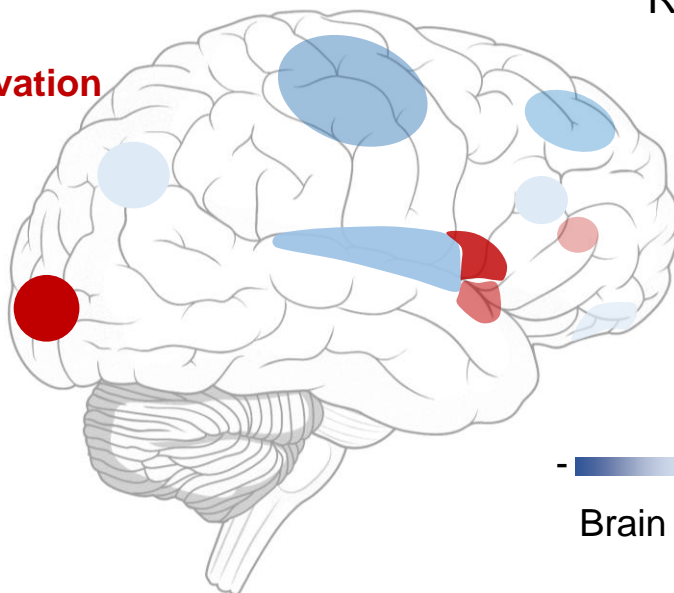

**Recall**

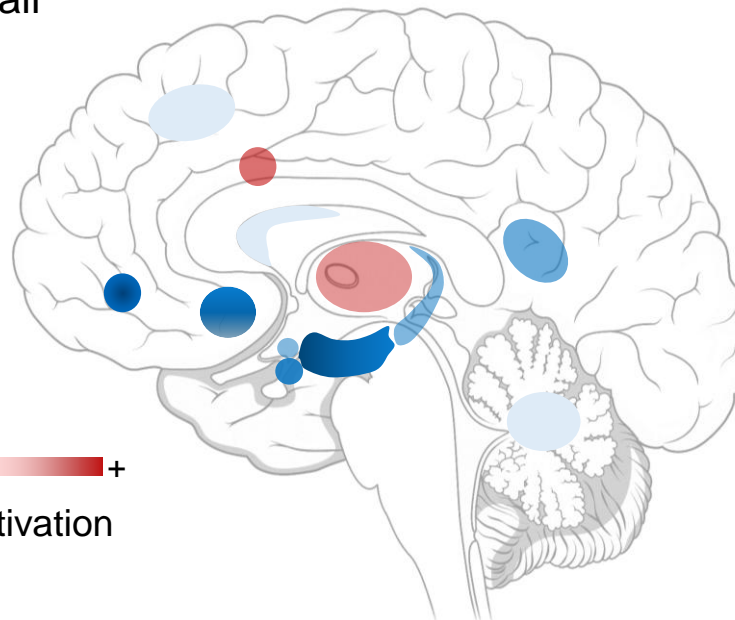

**Top 5 ROIs**

**Ranked by Deactivation**

- Postcentral
- vmPFC
- aHPC
- sgACC
- Precentral

-  +  
Brain Activation

**Fig S5**

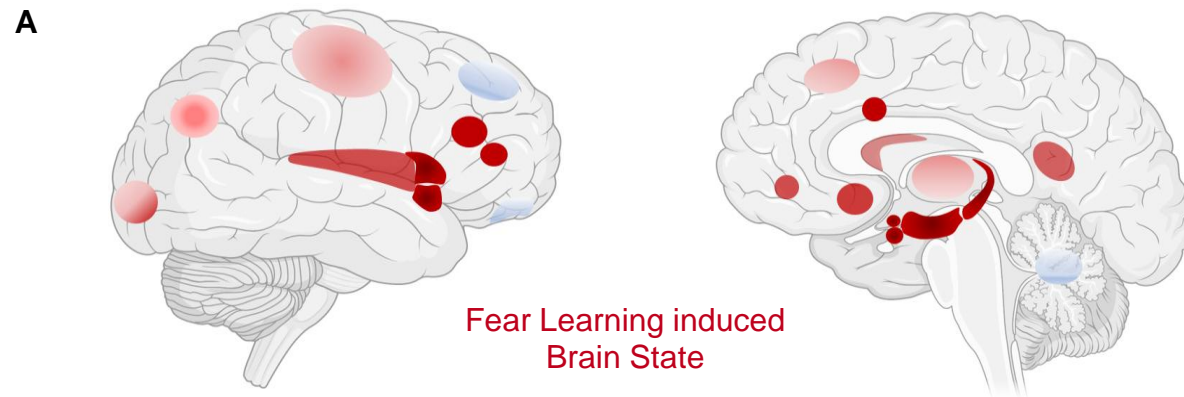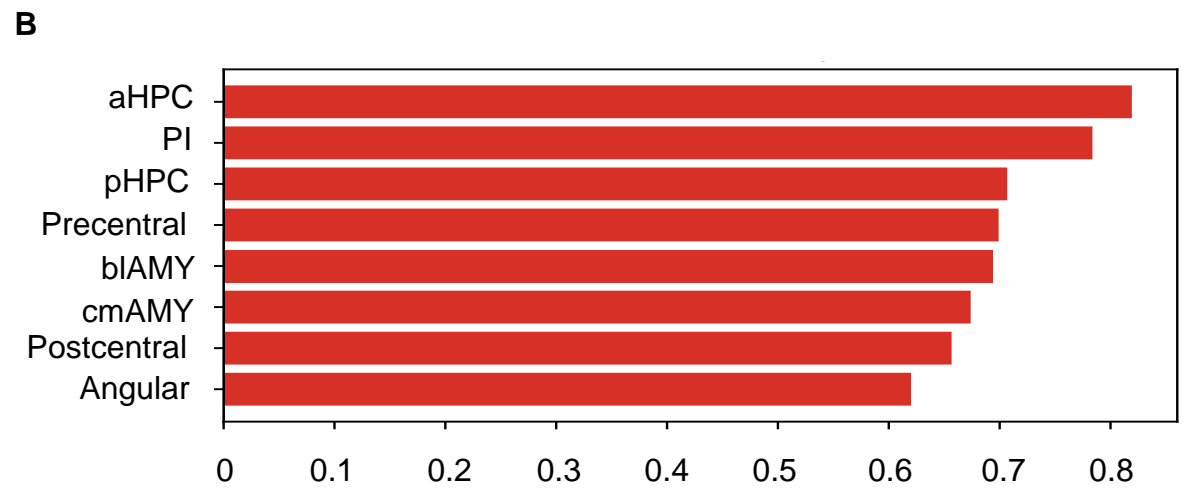

**Fig S6**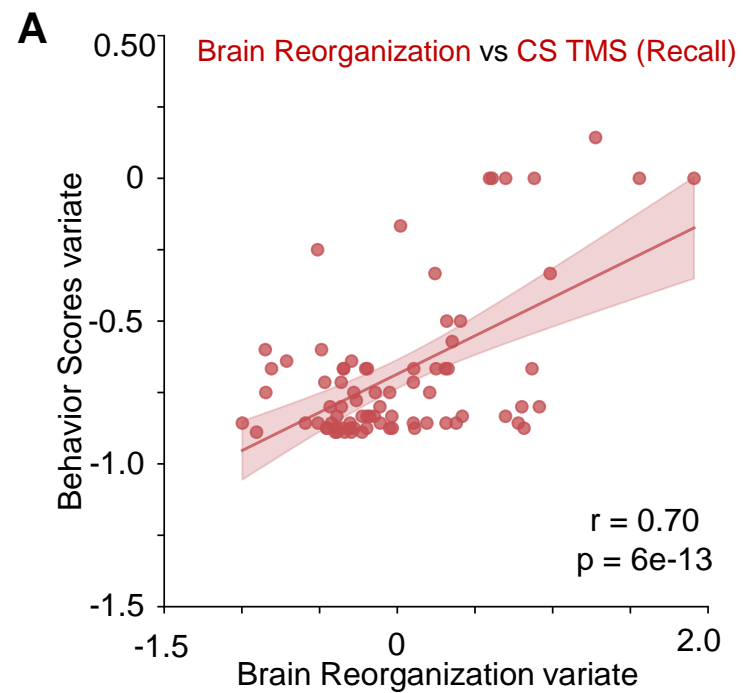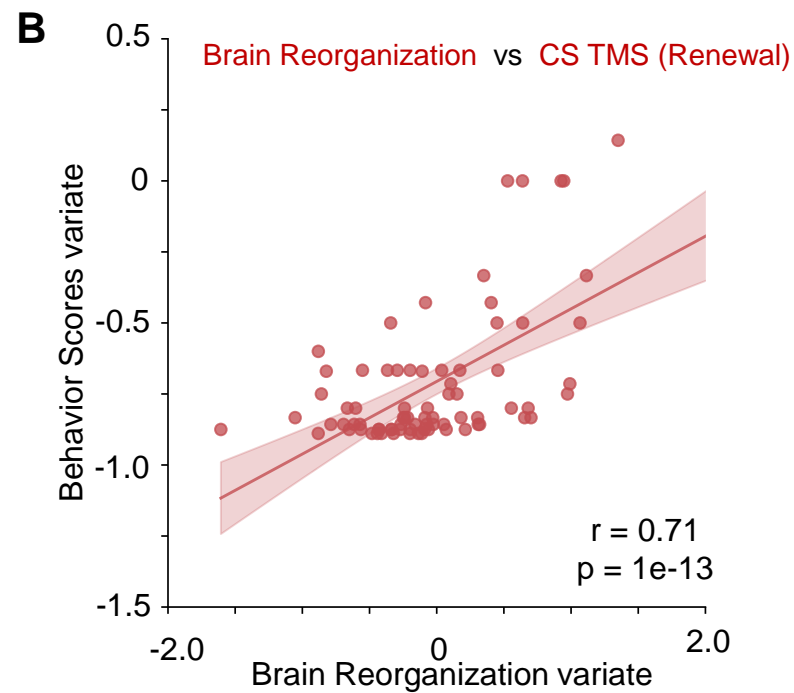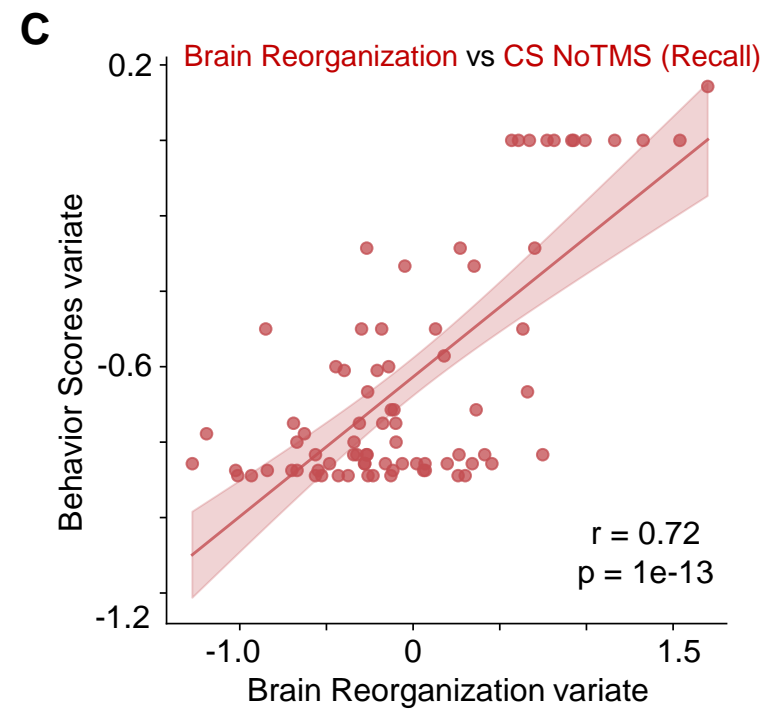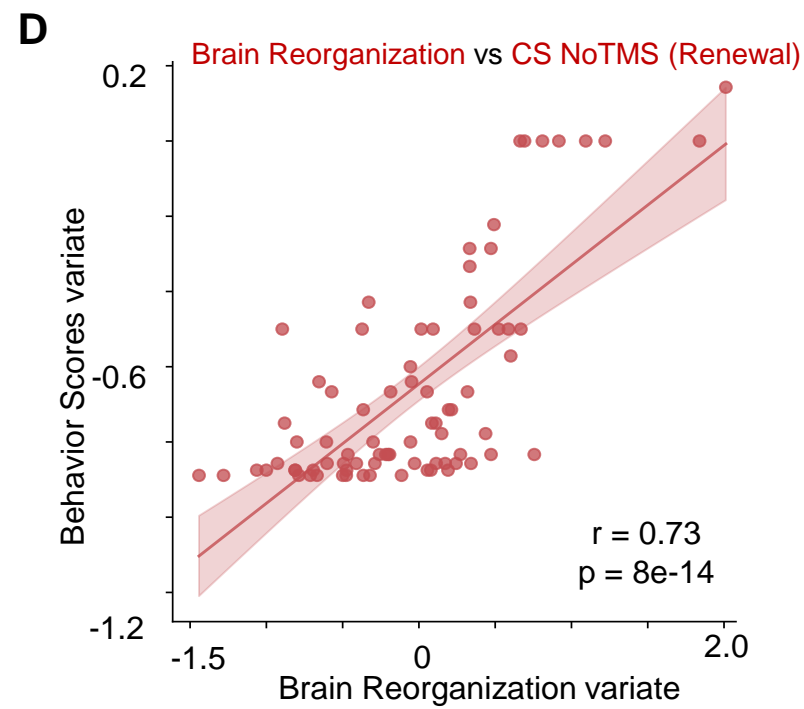

Supplement: Supplementary file 1 [file 0bf1e46857ca5f02168260a3.pdf]
